# Supplementary material for: A photo-triggered hydrogel for bidirectional regulation with imaging visualization
Source: Royal Society of Chemistry journal article supplement (doi:10.1039/d0sm01156h), 2020-01-01
Supplement: d0sm01156h1.pdf [file d0sm01156h1.pdf]

## Supporting information

### A photo-triggered hydrogel for bidirectional regulation with imaging visualization

Teng Ma, Shupeì Sheng, Xia Dong<sup>#</sup>, Yan zhang, Xuemin Li, Dunwan Zhu, Feng Lv \*

Tianjin Key Laboratory of Biomedical Materials, Key Laboratory of Biomaterials and Nanotechnology  
for Cancer Immunotherapy, Institute of Biomedical Engineering, Chinese Academy of Medical  
Sciences & Peking Union Medical College, Tianjin, 300192, PR China

\*Corresponding author:

Xia Dong

Institute of Biomedical Engineering

Chinese Academy of Medical Sciences & Peking Union Medical College

Tianjin 300192, PR China

Tel/Fax: 86-22-87893236, E-mail: [dongxiatj@163.com](mailto:dongxiatj@163.com) (Dong X)

Feng Lv

Institute of Biomedical Engineering

Chinese Academy of Medical Sciences & Peking Union Medical College

Tianjin 300192, PR China

Tel/Fax: 86-22-87893236, E-mail: [lvfeng2002@163.com](mailto:lvfeng2002@163.com) (Lv F)

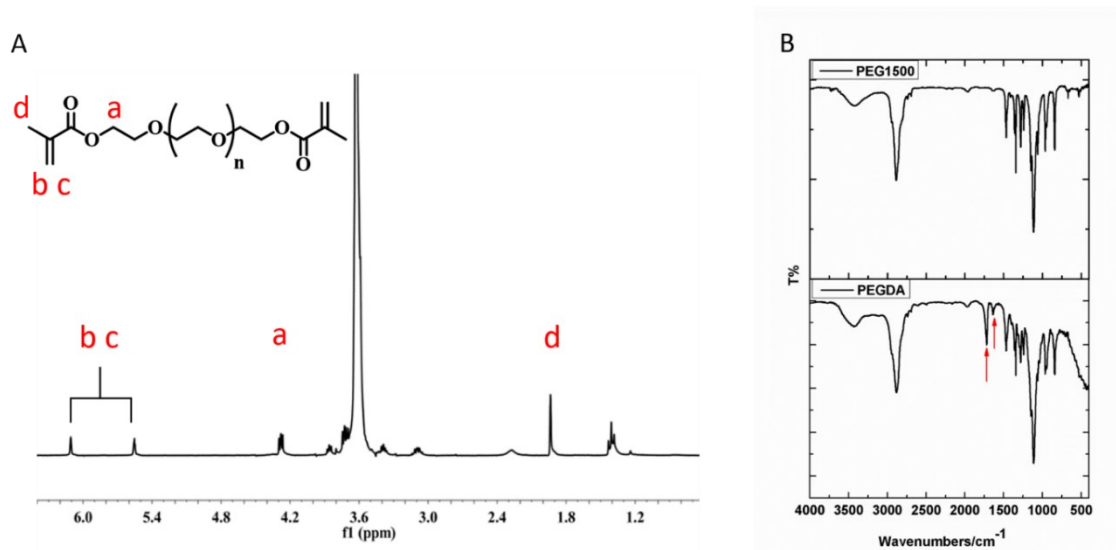

Figure S1.  $^1\text{H-NMR}$  of PEGDA (A) and IR spectra of PEG1500 and PEGDA (B).

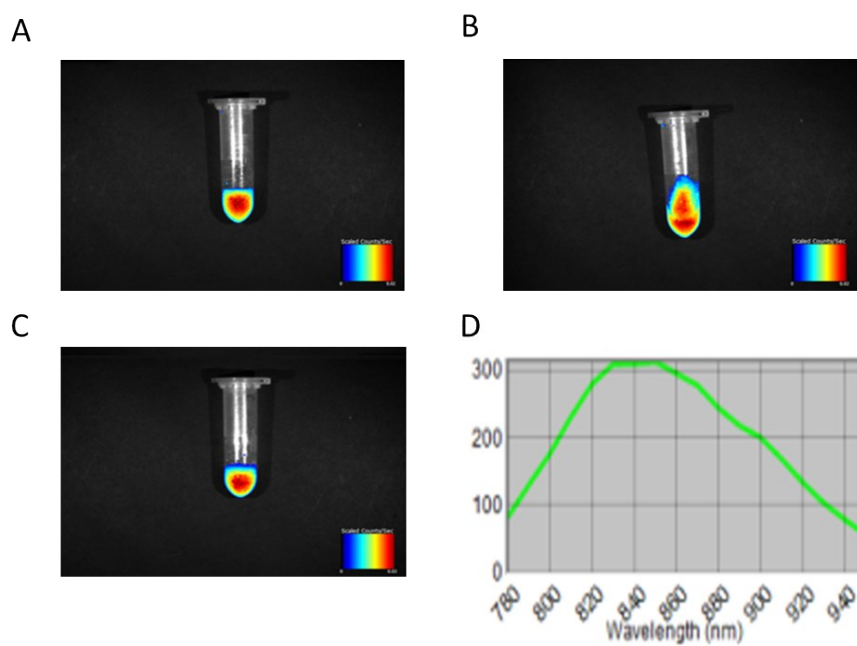

Figure S2. The fluorescence imaging of hydrogel in vitro. (A) IR820- $\alpha$ -CD/PEGDA hydrogel; (B) IR820- $\alpha$ -CD/PEGDA hydrogel after NIR irradiation; (C) UV-cured IR820- $\alpha$ -CD/PEGDA hydrogel; (D) Emission spectra of hydrogels fluorescence.
